# Supplementary material for: Recent progress in zeolitic imidazolate frameworks (ZIFs)-derived nanomaterials for effective lithium polysulfide management in lithium–sulfur batteries
Source: Royal Society of Chemistry journal article supplement (doi:10.1039/d3ta03098a), 2023-01-01
Supplement: d3ta03098a1.pdf [file d3ta03098a1.pdf]

### Supporting Information

Table S1. Different ZIFs-derives nanomaterials employed in cathodes as chemical regulators for LSBs.

| Sulfur host/<br>separator coating<br>layer | Dimension;<br>morphology    | Scale (nm)             | Sulfur loading;<br>sulfur mass ratio<br>in cathode (mg<br>cm <sup>-2</sup> ; %; μL mg <sup>-1</sup> ) | Voltage<br>window<br>(vs. Li <sup>+</sup> /Li)<br>(V) | Electrolyte; volume                                                                                      | Cycle performance                                                                                                                                                                                                                                                                                  | Rate performance                                                                                                                                                                     | Ref |
|--------------------------------------------|-----------------------------|------------------------|-------------------------------------------------------------------------------------------------------|-------------------------------------------------------|----------------------------------------------------------------------------------------------------------|----------------------------------------------------------------------------------------------------------------------------------------------------------------------------------------------------------------------------------------------------------------------------------------------------|--------------------------------------------------------------------------------------------------------------------------------------------------------------------------------------|-----|
| <i>Pristine and modified ZIFs</i>          |                             |                        |                                                                                                       |                                                       |                                                                                                          |                                                                                                                                                                                                                                                                                                    |                                                                                                                                                                                      |     |
| ZIF-8                                      | 3D; Rhombic<br>dodecahedron | N/A                    | N/A; 16.8%                                                                                            | 1.0-3.0                                               | 1.0 M LiTFSI & 0.1 M<br>LiNO <sub>3</sub> in DOL/DME<br>(v:v=1:1); N/A                                   | 0.1C/200 <sup>th</sup> /420 mAh g <sup>-1</sup>                                                                                                                                                                                                                                                    | 1C/450 mAh g <sup>-1</sup>                                                                                                                                                           | 151 |
| ZIF-8                                      | 3D; Rhombic<br>dodecahedron | 150/1000/3000          | N/A; 30%                                                                                              | 1.8-2.8                                               | 0.6 M LiTFSI & 0.1 M<br>LiNO <sub>3</sub> in DOL/DME<br>(v:v=1:1); 60 μL                                 | (Best 150 nm) 0.5C/100 <sup>th</sup> /~700<br>mAh g <sup>-1</sup>                                                                                                                                                                                                                                  | (150-200 nm) 1C/710<br>mAh g <sup>-1</sup>                                                                                                                                           | 49  |
| ZIF-8                                      | 3D; Rhombic<br>dodecahedron | 15/70/200/800/<br>2000 | N/A; 30%                                                                                              | 1.8-2.8                                               | 0.6 M LiTFSI & 0.1 M<br>LiNO <sub>3</sub> in DOL/DME<br>(v:v=1:1); 60 μL                                 | (Best 200 nm) 0.5C/250 <sup>th</sup> /~712<br>mAh g <sup>-1</sup>                                                                                                                                                                                                                                  | N/A                                                                                                                                                                                  | 153 |
| ZIF-8                                      | 3D; Porous<br>framework     | ~20                    | 2, 3.6, 7.4; 53.3%                                                                                    | 1.7-2.8                                               | 1.0 M LiTFSI & 0.1 M<br>LiNO <sub>3</sub> in DOL/DME<br>(v:v=1:1); 15, 8.74, 4.25<br>μL mg <sup>-1</sup> | (2 mg cm <sup>-2</sup> ) 0.2C/100 <sup>th</sup> /1060<br>mAh g <sup>-1</sup> ; 2C/500 <sup>th</sup> /674 mAh g <sup>-1</sup> ;<br>(3.6 mg cm <sup>-2</sup> )<br>N/A/200 <sup>th</sup> /2.8 mAh cm <sup>-2</sup> ;<br>(7.4 mg cm <sup>-2</sup> )<br>N/A/200 <sup>th</sup> /4.5 mAh cm <sup>-2</sup> | (2 mg cm <sup>-2</sup> ) 2C/803 mAh<br>g <sup>-1</sup> ;<br>(3.6 mg cm <sup>-2</sup> ) 2C/~700<br>mAh g <sup>-1</sup> ;<br>(7.4 mg cm <sup>-2</sup> ) 2C/~450<br>mAh g <sup>-1</sup> | 154 |
| ZIF-8@CNTs<br>sponge                       | 3D; Rhombic<br>dodecahedron | 40/500                 | N/A, 8; 64%                                                                                           | 1.7-2.8                                               | 1.0 M LiTFSI & 1 wt%<br>LiNO <sub>3</sub> in DOL/DME<br>(v:v=1:1); 20 μL mg <sup>-1</sup>                | (Best 500 nm) 0.1C/100 <sup>th</sup> /1269<br>mAh g <sup>-1</sup> ;<br>(8 mg cm <sup>-2</sup> ) 0.1C/100 <sup>th</sup> /1250<br>mAh g <sup>-1</sup>                                                                                                                                                | 1C/840 mAh g <sup>-1</sup>                                                                                                                                                           | 156 |
| Ni-doped ZIF-<br>8@CC                      | 3D; Rhombic<br>dodecahedron | ~220                   | 1.5, 5.5; 10, 29%                                                                                     | 1.8-2.8                                               | 1.0 M LiTFSI & 1 wt%<br>LiNO <sub>3</sub> in DOL/DME<br>(v:v=1:1); 30, 80 μL                             | (1.5 mg cm <sup>-2</sup> ) 0.2C/50 <sup>th</sup> /1036<br>mAh g <sup>-1</sup> ; 1C/500 <sup>th</sup> /715 mAh g <sup>-1</sup> ;<br>(5.5 mg cm <sup>-2</sup> ) 0.13C/100 <sup>th</sup> /~900<br>mAh g <sup>-1</sup>                                                                                 | (1.5 mg cm <sup>-2</sup> ) 3C/666<br>mAh g <sup>-1</sup>                                                                                                                             | 157 |
| ZIF-67-PPy                                 | 3D; Rhombic<br>dodecahedron | ~500                   | 0.5-1.2; 37.8%                                                                                        | 1.7-2.7                                               | 1.0 M LiTFSI in<br>DOL/DME (v:v=1:1);<br>35 μL                                                           | 0.5C/200 <sup>th</sup> /353.6 mAh g <sup>-1</sup>                                                                                                                                                                                                                                                  | 1C/500 mAh g <sup>-1</sup>                                                                                                                                                           | 158 |
| ZIF-67@MnO <sub>2</sub>                    | 3D; Rhombic<br>dodecahedron | ~500                   | N/A; 52.5%                                                                                            | 1.6-2.8                                               | 1.0 M LiTFSI & 2 wt%<br>LiNO <sub>3</sub> in DOL/DME<br>(v:v=1:1); 30 μL                                 | 0.5C/100 <sup>th</sup> /895 mAh g <sup>-1</sup> ;<br>1C/100 <sup>th</sup> /686 mAh g <sup>-1</sup> ;<br>2C/100 <sup>th</sup> /484 mAh g <sup>-1</sup>                                                                                                                                              | 5C/~500 mAh g <sup>-1</sup> ;<br>10C/210 mAh g <sup>-1</sup>                                                                                                                         | 159 |
| ZIF-67                                     | 3D; Rhombic<br>dodecahedron | 80-100                 | 1.6; 49%                                                                                              | 1.5-3.0                                               | 1.0 M LiTFSI & 1 wt%<br>LiNO <sub>3</sub> in DOL/DME<br>(v:v=1:1); N/A                                   | 2C/300 <sup>th</sup> /816 mAh g <sup>-1</sup>                                                                                                                                                                                                                                                      | 2C/826 mAh g <sup>-1</sup>                                                                                                                                                           | 56  |
| ZIF-8@3DC                                  | 3D; Porous<br>framework     | N/A                    | 1.8-2.0; 70%                                                                                          | 1.7-2.8                                               | 1.0 M LiTFSI & 1.5<br>wt% LiNO <sub>3</sub> in<br>DOL/DME (v:v=1:1);<br>N/A                              | 1C/200 <sup>th</sup> /943.8 mAh g <sup>-1</sup> ;<br>3C/800 <sup>th</sup> /545.4 mAh g <sup>-1</sup>                                                                                                                                                                                               | 3C/>500 mAh g <sup>-1</sup>                                                                                                                                                          | 161 |
| ZIF-8                                      | 2D;<br>Membrane             | N/A                    | 2.5; 70%                                                                                              | N/A                                                   | 1.0 M LiTFSI & 0.1 M<br>LiNO <sub>3</sub> in DOL/DME<br>(v:v=1:1); N/A                                   | 0.4C/200 <sup>th</sup> /1231.3 mAh g <sup>-1</sup> ;<br>0.8C/200 <sup>th</sup> /514.8 mAh g <sup>-1</sup>                                                                                                                                                                                          | N/A                                                                                                                                                                                  | 57  |
| ZIF-L(Co)-PMIA                             | 2D;<br>Nanosheet            | 1000                   | N/A, 9.23, 6.92;<br>N/A                                                                               | 1.7-2.8                                               | 1.0 M LiTFSI & 1 wt%<br>LiNO <sub>3</sub> in DOL/DME<br>(v:v=1:1); N/A                                   | 0.2C/350 <sup>th</sup> /961.1 mAh g <sup>-1</sup> ;<br>(6.92 mg cm <sup>-2</sup> )<br>0.2C/150 <sup>th</sup> /4.11 mAh cm <sup>-2</sup> ;<br>(9.23 mg cm <sup>-2</sup> )<br>0.2C/150 <sup>th</sup> /~8 mAh cm <sup>-2</sup>                                                                        | 2C/774.8 mAh g <sup>-1</sup>                                                                                                                                                         | 162 |

|                                                                        |                             |         |                                    |         |                                                                                                                                |                                                                                                                                                                                                                        |                                                                                                                                            |     |
|------------------------------------------------------------------------|-----------------------------|---------|------------------------------------|---------|--------------------------------------------------------------------------------------------------------------------------------|------------------------------------------------------------------------------------------------------------------------------------------------------------------------------------------------------------------------|--------------------------------------------------------------------------------------------------------------------------------------------|-----|
| Zn/Co-ZIF                                                              | 2D;<br>Nanosheet            | ~2000   | 2.5, 5.3; 74.6%                    | 1.7-2.8 | 1.0 M LiTFSI & 1 wt%<br>LiNO <sub>3</sub> in DOL/DME<br>(v:v=1:1); 20 $\mu$ L mg <sup>-1</sup>                                 | (2.5 mg cm <sup>-2</sup> )<br>2C/1000 <sup>th</sup> /630 mAh g <sup>-1</sup> ;<br>(5.3 mg cm <sup>-2</sup> )<br>0.2C/60 <sup>th</sup> /5.3 mAh cm <sup>-2</sup>                                                        | (2.5 mg cm <sup>-2</sup> )<br>3C/788 mAh g <sup>-1</sup>                                                                                   | 163 |
| CPP@PVA/ZIF-8                                                          | 3D; Rhombic<br>dodecahedron | 500-600 | 1.2; 60%                           | 1.7-2.8 | 1.0 M LiTFSI & 1 wt%<br>LiNO <sub>3</sub> in DOL/DME<br>(v:v=1:1); 35 $\mu$ L                                                  | 0.2C/300 <sup>th</sup> /~800 mAh g <sup>-1</sup>                                                                                                                                                                       | (1.2 mg cm <sup>-2</sup> )<br>3C/701.9 mAh g <sup>-1</sup> ;<br>(2.0 mg cm <sup>-2</sup> )<br>3C/646.4 mAh g <sup>-1</sup>                 | 164 |
| <b>ZIFs derived NC</b>                                                 |                             |         |                                    |         |                                                                                                                                |                                                                                                                                                                                                                        |                                                                                                                                            |     |
| microporous<br>carbon polyhedrons<br>(MPCPs)                           | 3D; Rhombic<br>dodecahedron | ~1500   | N/A; 34.4%, 50.4%                  | 1.2-3.0 | ①1.0 M LiPF <sub>6</sub> in<br>EC/DEC (w:w=1:1)<br>②1.0 M LiTFSI in<br>TEGDME<br>③1.0 M LiTFSI in<br>DOL/DME (v:v=1:1);<br>N/A | (Best 34.4%, ③)<br>100 mA g <sup>-1</sup> /100 <sup>th</sup> /490 mAh g <sup>-1</sup> ;                                                                                                                                | (34.4%, ①)<br>1000 mA g <sup>-1</sup> /~200 mAh<br>g <sup>-1</sup> ;<br>(50.4%, ③)<br>1000 mA g <sup>-1</sup> /~200 mAh<br>g <sup>-1</sup> | 167 |
| Hollow<br>N-doped carbon<br>(HNC)                                      | 3D; Rhombic<br>dodecahedron | ~400    | 1, 5; 49%                          | 1.7-2.8 | 1.0 M LiTFSI & 2 wt%<br>LiNO <sub>3</sub> in DOL/DME<br>(v:v=1:1); 30 $\mu$ L mg <sup>-1</sup>                                 | (1 mg cm <sup>-2</sup> )<br>1C/500 <sup>th</sup> /404.3 mAh g <sup>-1</sup> ;<br>(5 mg cm <sup>-2</sup> )<br>0.2C/200 <sup>th</sup> /~250 mAh g <sup>-1</sup>                                                          | (1 mg cm <sup>-2</sup> )<br>2C/433 mAh g <sup>-1</sup>                                                                                     | 168 |
| Hierarchical porous<br>carbon (HPC)                                    | 2D;<br>Nanosheet            | 2000    | 2; 56%                             | 1.7-2.8 | 1.0 M LiTFSI & 1 wt%<br>LiNO <sub>3</sub> in DOL/DME<br>(v:v=1:1); 10 $\mu$ L mg <sup>-1</sup>                                 | 0.2C/100 <sup>th</sup> /800 mAh g <sup>-1</sup> ;<br>0.5C/300 <sup>th</sup> /587 mAh g <sup>-1</sup>                                                                                                                   | 2C/785 mAh g <sup>-1</sup>                                                                                                                 | 169 |
| NC                                                                     | 3D; Rhombic<br>dodecahedron | ~500    | 0.8-1.0; 41.25%,<br>45%            | 1.7-2.8 | 1.0 M LiTFSI & 2 wt%<br>LiNO <sub>3</sub> in DOL/DME<br>(v:v=1:1); N/A                                                         | (Best 800 °C, 41.25%)<br>800 mA g <sup>-1</sup> /400 <sup>th</sup> /618 mAh g <sup>-1</sup>                                                                                                                            | (Best 800 °C, 41.25%)<br>1600 mA g <sup>-1</sup> /700 mAh g <sup>-1</sup>                                                                  | 170 |
| rGO/ZIF-8(C)                                                           | 3D; Rhombic<br>dodecahedron | ~100    | 1.5-2.5; 56%                       | 1.5-2.8 | 1.0 M LiTFSI & 2 wt%<br>LiNO <sub>3</sub> in DOL/DME<br>(v:v=1:1); N/A                                                         | 1C/500 <sup>th</sup> /736 mAh g <sup>-1</sup>                                                                                                                                                                          | 2C/688 mAh g <sup>-1</sup>                                                                                                                 | 171 |
| CNT-threaded<br>nitrogen-doped<br>porous carbon film<br>(CNCF)<br>S, N | 3D; Irregular<br>polyhedron | ~600    | 3, 6.9; 70%                        | 1.8-2.6 | 1.0 M LiTFSI & 1 wt%<br>LiNO <sub>3</sub> in DOL/DME<br>(v:v=1:1); N/A                                                         | (3 mg cm <sup>-2</sup> )<br>1C/1800 <sup>th</sup> /614 mAh g <sup>-1</sup> ;<br>(6.9 mg cm <sup>-2</sup> )<br>0.2C/300 <sup>th</sup> /790 mAh g <sup>-1</sup>                                                          | (3 mg cm <sup>-2</sup> )<br>10C/652 mAh g <sup>-1</sup>                                                                                    | 172 |
| dually doped<br>porous carbon<br>nanofibers (SN-<br>PCNF)              | 3D; Rhombic<br>dodecahedron | N/A     | 1.3-1.5; 83.3%                     | 1.6-3.0 | 1.0 M LiTFSI & 1 wt%<br>LiNO <sub>3</sub> in DOL/DME<br>(v:v=1:1); N/A                                                         | 0.1C/150 <sup>th</sup> /554 mAh g <sup>-1</sup>                                                                                                                                                                        | 0.5C/553 mAh g <sup>-1</sup>                                                                                                               | 173 |
| <b>Metal/NC</b>                                                        |                             |         |                                    |         |                                                                                                                                |                                                                                                                                                                                                                        |                                                                                                                                            |     |
| RGO/C-Co                                                               | 3D; Rhombic<br>dodecahedron | ~900    | 1; 56.7%                           | 1.8-2.6 | 1.0 M LiTFSI & 0.1 M<br>LiNO <sub>3</sub> in DOL/DME<br>(v:v=1:1); N/A                                                         | 0.3 A g <sup>-1</sup> /300 <sup>th</sup> /949 mAh g <sup>-1</sup>                                                                                                                                                      | 5 A g <sup>-1</sup> /479 mAh g <sup>-1</sup>                                                                                               | 175 |
| Co-N/KB                                                                | 3D; Irregular<br>polyhedron | N/A     | 3-5; 56%                           | 1.7-2.8 | 1.0 M LiTFSI & 1 wt%<br>LiNO <sub>3</sub> in DOL/DME<br>(v:v=1:1); 10, 20, 30 $\mu$ L<br>mg <sup>-1</sup>                      | (5 mg cm <sup>-2</sup> , 30 $\mu$ L mg <sup>-1</sup> )<br>0.1C/100 <sup>th</sup> /838 mAh g <sup>-1</sup> ;<br>(3 mg cm <sup>-2</sup> , 30 $\mu$ L mg <sup>-1</sup> )<br>1C/400 <sup>th</sup> /546 mAh g <sup>-1</sup> | (3 mg cm <sup>-2</sup> , 30 $\mu$ L mg <sup>-1</sup> )<br>1C/629 mAh g <sup>-1</sup>                                                       | 176 |
| Co@NCNP/NCNT                                                           | 3D; Rhombic<br>dodecahedron | ~1500   | 4, 6, 10, 14; 17.5%,<br>21%, 24.5% | 1.8-2.7 | 1.0 M LiTFSI & 1 wt%<br>LiNO <sub>3</sub> in DOL/DME<br>(v:v=1:1); N/A (gel<br>electrolyte)                                    | (4 mg cm <sup>-2</sup> )<br>2 mA cm <sup>-2</sup> /500 <sup>th</sup> /555 mAh g <sup>-1</sup> ;<br>(14 mg cm <sup>-2</sup> )<br>2 mA cm <sup>-2</sup> /200 <sup>th</sup> /350 mAh g <sup>-1</sup>                      | (4 mg cm <sup>-2</sup> )<br>2 mA cm <sup>-2</sup> /611 mAh g <sup>-1</sup>                                                                 | 177 |
| Co-NC@N-HCSs                                                           | 3D; Rhombic<br>dodecahedron | ~100    | 1.23-1.76; 64%                     | 1.7-2.8 | 1.0 M LiTFSI & 2 wt%<br>LiNO <sub>3</sub> in DOL/DME                                                                           | (1.334 mg cm <sup>-2</sup> )<br>1C/450 <sup>th</sup> /399.7 mAh g <sup>-1</sup>                                                                                                                                        | (1.61 mg cm <sup>-2</sup> )<br>3C/495.5 mAh g <sup>-1</sup>                                                                                | 178 |

|                                    |                                 |                                                  |                                   |         | (v:v=1:1); 12 $\mu\text{L mg}^{-1}$                                                          |                                                                                                                                                                                                                                                  |                                                                                           |     |
|------------------------------------|---------------------------------|--------------------------------------------------|-----------------------------------|---------|----------------------------------------------------------------------------------------------|--------------------------------------------------------------------------------------------------------------------------------------------------------------------------------------------------------------------------------------------------|-------------------------------------------------------------------------------------------|-----|
| Co-NC@C                            | 3D; Rhombic dodecahedron        | ~1000                                            | 1.0-1.4, 3.8-10.2; 56%            | 1.7-2.7 | 1.0 M LiTFSI & 0.2 M LiNO <sub>3</sub> in DOL/DME (v:v=1:1); 8.3-16 $\mu\text{L mg}^{-1}$    | (1.0-1.4 mg cm <sup>-2</sup> )<br>1C/2700 <sup>th</sup> /454.9 mAh g <sup>-1</sup> ;<br>(10.2 mg cm <sup>-2</sup> )<br>0.1C/80 <sup>th</sup> /6.3 mAh cm <sup>-2</sup>                                                                           | (1.0-1.4 mg cm <sup>-2</sup> )<br>5C/635.8 mAh g <sup>-1</sup>                            | 179 |
| C-Co/TiO <sub>2</sub>              | 3D; Rhombic dodecahedron        | 300-400                                          | 1.5; 49%                          | 1.5-2.8 | 1.0 M LiTFSI & 1 wt% LiNO <sub>3</sub> in DOL/DME (v:v=1:1); N/A                             | 1C/300 <sup>th</sup> /466.3 mAh g <sup>-1</sup> ;<br>2C/300 <sup>th</sup> /384.5 mAh g <sup>-1</sup>                                                                                                                                             | 3C/383.8 mAh g <sup>-1</sup>                                                              | 180 |
| Cellular Co@N-C                    | 2D;<br>Honeycomb-like nanosheet | 6000                                             | 25, 3.6, 4.9, 7.5; 49%, 76.5%     | 1.7-2.7 | 0.5 M LiOTf & 0.5 M LiNO <sub>3</sub> in DOL/DME (v:v=1:1); 8.3-16 $\mu\text{L mg}^{-1}$     | (3.6 mg cm <sup>-2</sup> )<br>2C/850 <sup>th</sup> /514 mAh g <sup>-1</sup> ;<br>(7.5 mg cm <sup>-2</sup> )<br>1C/300 <sup>th</sup> /~400mAh g <sup>-1</sup>                                                                                     | (3.6 mg cm <sup>-2</sup> )<br>5C/485 mAh g <sup>-1</sup> ;<br>10C/390 mAh g <sup>-1</sup> | 181 |
| Co-NGC@NCNF                        | N/A                             | N/A                                              | 2, 4.2, 6.5; 77%                  | 1.7-2.8 | 1.0 M LiTFSI & 2 wt% LiNO <sub>3</sub> in DOL/DME (v:v=1:1); 12 $\mu\text{L mg}^{-1}$        | (2 mg cm <sup>-2</sup> )<br>2C/500 <sup>th</sup> /556.9 mAh g <sup>-1</sup> ;<br>(6.5 mg cm <sup>-2</sup> )<br>0.5C/150 <sup>th</sup> /~650mAh g <sup>-1</sup><br>(1.5 mg cm <sup>-2</sup> )<br>4C/800 <sup>th</sup> /~500 mAh g <sup>-1</sup> ; | (2 mg cm <sup>-2</sup> )<br>5C/671 mAh g <sup>-1</sup>                                    | 182 |
| Co@NC                              | 2D;<br>Nanosheet                | 5000 (length)<br>200 (thickness)<br>3000 (width) | 1.5, 6.11, 10.73; 60%             | 1.7-2.8 | 1.0 M LiTFSI & 0.2 M LiNO <sub>3</sub> in DOL/DME (v:v=1:1); 30, 40, 50 $\mu\text{L}$        | (6.11 mg cm <sup>-2</sup> )<br>0.2C/180 <sup>th</sup> /3.7 mAh cm <sup>-2</sup> ;<br>(10.73 mg cm <sup>-2</sup> )<br>0.2C/120 <sup>th</sup> /6.21 mAh cm <sup>-2</sup>                                                                           | (1.5 mg cm <sup>-2</sup> )<br>4C/634 mAh g <sup>-1</sup>                                  | 27  |
| Co-SAs/NC                          | 3D; Rhombic dodecahedron        | ~100                                             | 1.5, 4.3; 56%                     | 1.8-2.8 | 1.0 M LiTFSI & 2 wt% LiNO <sub>3</sub> in DOL/DME (v:v=1:1); 15, 5.7 $\mu\text{L mg}^{-1}$   | (1.5 mg cm <sup>-2</sup> )<br>1C/500 <sup>th</sup> /667 mAh g <sup>-1</sup> ;<br>(4.3 mg cm <sup>-2</sup> )<br>0.2C/150 <sup>th</sup> /935 mAh g <sup>-1</sup><br>(2 mg cm <sup>-2</sup> )                                                       | (1.5 mg cm <sup>-2</sup> )<br>2C/815 mAh g <sup>-1</sup>                                  | 79  |
| Co-SAs                             | 3D; Rhombic dodecahedron        | ~600                                             | 2, 3, 4, 5; 52.5%                 | 1.7-2.7 | 1.0 M LiTFSI & 2 wt% LiNO <sub>3</sub> in DOL/DME (v:v=1:1); 35-50 $\mu\text{L}$             | (1 mg cm <sup>-2</sup> )<br>1C/600 <sup>th</sup> /737 mAh g <sup>-1</sup> ;<br>(5 mg cm <sup>-2</sup> )<br>1C/150 <sup>th</sup> /~550 mAh g <sup>-1</sup>                                                                                        | (2 mg cm <sup>-2</sup> )<br>10C/670 mAh g <sup>-1</sup>                                   | 185 |
| Co-N <sub>4</sub><br>@2D/3D carbon | 2D/3D;<br>Nanoflower            | ~3000                                            | 1.0, 2.8, 3.7, 4.6; 73%           | 1.7-2.8 | 1.0 M LiTFSI & 2 wt% LiNO <sub>3</sub> in DOL/DME (v:v=1:1); 15, 8 $\mu\text{L mg}^{-1}$     | (1 mg cm <sup>-2</sup> )<br>1C/500 <sup>th</sup> /700 mAh g <sup>-1</sup> ;<br>(4.6 mg cm <sup>-2</sup> )<br>0.2C/100 <sup>th</sup> /~3.9 mAh cm <sup>-2</sup>                                                                                   | (1 mg cm <sup>-2</sup> )<br>5C/695 mAh g <sup>-1</sup>                                    | 186 |
| CoSA-N-C                           | 2D;<br>Nanosheet                | N/A                                              | 1.2, 4.9; 60%                     | 1.7-2.8 | 1.0 M LiTFSI & 0.2 M LiNO <sub>3</sub> in DOL/DME (v:v=1:1); 30, 40 $\mu\text{L}$            | (1.2 mg cm <sup>-2</sup> )<br>1C/1000 <sup>th</sup> /675 mAh g <sup>-1</sup> ;<br>(4.9 mg cm <sup>-2</sup> )<br>0.2C/120 <sup>th</sup> /~4.3 mAh cm <sup>-2</sup>                                                                                | (1.2 mg cm <sup>-2</sup> )<br>5C/624 mAh g <sup>-1</sup>                                  | 187 |
| Co-N <sub>2</sub>                  | 2D;<br>Nanosheet                | N/A                                              | 1, 7; 56%                         | 1.8-2.8 | 1.0 M LiTFSI & 2 wt% LiNO <sub>3</sub> in DOL/DME (v:v=1:1); 17.3, 7.7 $\mu\text{L mg}^{-1}$ | (1 mg cm <sup>-2</sup> )<br>0.5C/700 <sup>th</sup> /571 mAh g <sup>-1</sup> ;<br>(4.9 mg cm <sup>-2</sup> )<br>0.1C/70 <sup>th</sup> /5.9 mAh cm <sup>-2</sup>                                                                                   | (1 mg cm <sup>-2</sup> )<br>2C/799 mAh g <sup>-1</sup>                                    | 184 |
| ZnN-cZIF-8                         | 3D; Rhombic dodecahedron        | ~1000                                            | 5.74, 6.38; 56%                   | 1.8-2.8 | 1.0 M LiTFSI & 0.1 M LiNO <sub>3</sub> in DOL/DME (v:v=1:1); 6 $\mu\text{L mg}^{-1}$         | (5.74 mg cm <sup>-2</sup> )<br>0.2C/200 <sup>th</sup> /~700 mAh g <sup>-1</sup>                                                                                                                                                                  | (6.38 mg cm <sup>-2</sup> )<br>2C/~700 mAh g <sup>-1</sup>                                | 188 |
| Ag/VN@Co/NCNT                      | 1D;<br>Nanowire                 | ~1000                                            | 1.0-1.3, 2.8, 5.1, 7.2, 10.3; 60% | 1.7-2.8 | 1.0 M LiTFSI & 0.1 M LiNO <sub>3</sub> in DOL/DME (v:v=1:1); 20, 10-15 $\mu\text{L mg}^{-1}$ | (1.0-1.3 mg cm <sup>-2</sup> )<br>2C/1000 <sup>th</sup> /600 mAh g <sup>-1</sup> ;<br>(10.3 mg cm <sup>-2</sup> )<br>0.5C/100 <sup>th</sup> /4.37 mAh cm <sup>-2</sup>                                                                           | 4C/767.7 mAh g <sup>-1</sup>                                                              | 189 |
| Ni-N <sub>5</sub> /HNPC            | 3D; Hollow rhombic dodecahedron | ~400                                             | 1.6, 2.7, 5.1; 64%                | 1.7-2.7 | 1.0 M LiTFSI & 0.1 M LiNO <sub>3</sub> in DOL/DME (v:v=1:1); 20 $\mu\text{L}$                | (1.6 mg cm <sup>-2</sup> )<br>0.5C/500 <sup>th</sup> /798 mAh g <sup>-1</sup> ;<br>(5.1 mg cm <sup>-2</sup> )<br>0.1C/80 <sup>th</sup> /~4.0 mAh cm <sup>-2</sup>                                                                                | (1.6 mg cm <sup>-2</sup> )<br>4C/684 mAh g <sup>-1</sup>                                  | 190 |

|                                                                  |                                              |         |                     |         |                                                                                                         |                                                                                                                                                                    |                                                              |     |
|------------------------------------------------------------------|----------------------------------------------|---------|---------------------|---------|---------------------------------------------------------------------------------------------------------|--------------------------------------------------------------------------------------------------------------------------------------------------------------------|--------------------------------------------------------------|-----|
| Co <sub>0.75</sub> Ni <sub>0.25</sub> -NC/CNTs                   | 1D; Nanotube                                 | ~100    | 1, 42%              | 1.7-2.8 | N/A; N/A                                                                                                | 0.2C/200 <sup>th</sup> /~600 mAh g <sup>-1</sup>                                                                                                                   | 2C/~600 mAh g <sup>-1</sup>                                  | 191 |
| Ni <sub>2</sub> Co@rGO                                           | 3D; Irregular polyhedron                     | ~2500   | 2, 4, 6.2; 60%      | 1.7-2.7 | 1.0 M LiTFSI & 1 wt% LiNO <sub>3</sub> in DOL/DME (v:v=1:1); 10, 7.5, 4.8 μL mg <sup>-1</sup>           | (2 mg cm <sup>-2</sup> )<br>1C/500 <sup>th</sup> /650.7 mAh g <sup>-1</sup> ;<br>(6.2 mg cm <sup>-2</sup> )<br>0.2C/50 <sup>th</sup> /~5.7 mAh cm <sup>-2</sup>    | (2 mg cm <sup>-2</sup> )<br>5C/437.3 mAh g <sup>-1</sup>     | 192 |
| N, S-Mo <sub>2</sub> C/C-ACF                                     | 3D; Nanoflower                               | ~5000   | 0.9-1.3, 2.3; 60%   | 1.7-2.8 | 1.0 M LiTFSI & 2 wt% LiNO <sub>3</sub> in DOL/DME (v:v=1:1); 15 μL mg <sup>-1</sup>                     | (0.9-1.3 mg cm <sup>-2</sup> )<br>1C/600 <sup>th</sup> /~550 mAh g <sup>-1</sup> ;<br>(2.3 mg cm <sup>-2</sup> )<br>0.5C/80 <sup>th</sup> /800 mAh g <sup>-1</sup> | (0.9-1.3 mg cm <sup>-2</sup> )<br>5C/630 mAh g <sup>-1</sup> | 193 |
| <b>Metal (hydr)oxides/NC</b>                                     |                                              |         |                     |         |                                                                                                         |                                                                                                                                                                    |                                                              |     |
| N-Co <sub>3</sub> O <sub>4</sub> @N-C/rGO                        | 3D; Rhombic dodecahedron                     | ~4000   | 2.13, 5.89; 64%     | 1.7-2.7 | 1.0 M LiTFSI & 1 wt% LiNO <sub>3</sub> in DOL/DME (v:v=1:1); 30 μL                                      | (2.13 mg cm <sup>-2</sup> )<br>2C/1000 <sup>th</sup> /611 mAh g <sup>-1</sup> ;<br>(5.89 mg cm <sup>-2</sup> )<br>0.2C/500 <sup>th</sup> /568 mAh g <sup>-1</sup>  | (2.13 mg cm <sup>-2</sup> )<br>3C/652 mAh g <sup>-1</sup>    | 197 |
| ZnO in ZDC@ZIF-8                                                 | 3D; Rhombic dodecahedron                     | ~600    | N/A, 6.9; 60%       | 1.8-2.6 | 1.0 M LiTFSI & 0.1 M LiNO <sub>3</sub> in DOL/DME (v:v=1:1); 20 μL                                      | 1C/300 <sup>th</sup> /683 mAh g <sup>-1</sup> ;<br>(6.9 mg cm <sup>-2</sup> )<br>2.3 mA cm <sup>-2</sup> /100 <sup>th</sup> /962 mAh g <sup>-1</sup>               | 3C/563 mAh g <sup>-1</sup>                                   | 198 |
| ZPC@HMn <sub>3</sub> O <sub>4</sub> /NC                          | 3D; Hollow dodecahedron                      | ~1000   | 1.5; 56%            | 1.7-2.8 | 1.0 M LiTFSI & 1 wt% LiNO <sub>3</sub> in DOL/DME (v:v=1:1); N/A                                        | 5C/1000 <sup>th</sup> /301 mAh g <sup>-1</sup>                                                                                                                     | 8C/430 mAh g <sup>-1</sup>                                   | 200 |
| Ni-Co oxide/CNTs                                                 | 1D; Nanotube                                 | ~60     | 1; N/A              | 1.7-2.8 | 1.0 M LiTFSI & 2 wt% LiNO <sub>3</sub> in DOL/DME (v:v=1:1); N/A                                        | 0.2C/600 <sup>th</sup> /650 mAh g <sup>-1</sup>                                                                                                                    | 2C/232.3 mAh g <sup>-1</sup>                                 | 202 |
| C/NiCo <sub>2</sub> O <sub>4</sub>                               | 3D; Irregular polyhedron                     | ~1800   | N/A; 49%            | 1.5-3.0 | 1.0 M LiTFSI & 0.5 M Li <sub>2</sub> S <sub>6</sub> & 2 wt% LiNO <sub>3</sub> in DOL/DME (v:v=1:1); N/A | 0.5C/500 <sup>th</sup> /673 mAh g <sup>-1</sup>                                                                                                                    | 2C/518 mAh g <sup>-1</sup>                                   | 203 |
| ZnCo <sub>2</sub> O <sub>4</sub> @Ti <sub>3</sub> C <sub>2</sub> | 3D; Irregular polyhedron                     | N/A     | 1.0-1.5; 52.5%      | 1.7-2.8 | 1.0 M LiTFSI & 2 wt% LiNO <sub>3</sub> in DOL/DME (v:v=1:1); N/A                                        | 0.5C/400 <sup>th</sup> /306 mAh g <sup>-1</sup>                                                                                                                    | 2C/429.3 mAh g <sup>-1</sup>                                 | 204 |
| CH@LDH                                                           | 3D; Double-shell hollow rhombic dodecahedron | ~1000   | 2.8-3.2; 52.5%      | 1.7-2.8 | 1.0 M LiTFSI & 0.2 M LiNO <sub>3</sub> in DOL/DME (v:v=1:1); N/A                                        | (3 mg cm <sup>-2</sup> )<br>0.1C/100 <sup>th</sup> /653 mAh g <sup>-1</sup>                                                                                        | (3 mg cm <sup>-2</sup> )<br>1C/500 mAh g <sup>-1</sup>       | 207 |
| ZnCo-LDH-CNT                                                     | 1D; Nanotube                                 | 100     | 1.5, 3, 5.5; 60%    | 1.7-2.8 | 1.0 M LiTFSI & 1 wt% LiNO <sub>3</sub> in DOL/DME (v:v=1:1); N/A, 11, 6 μL mg <sup>-1</sup>             | (1.5 mg cm <sup>-2</sup> )<br>1C/500 <sup>th</sup> /687.8 mAh g <sup>-1</sup> ;<br>(5.5 mg cm <sup>-2</sup> )<br>0.1C/100 <sup>th</sup> /4.4 mAh cm <sup>-2</sup>  | (1.5 mg cm <sup>-2</sup> )<br>5C/730.1 mAh g <sup>-1</sup>   | 208 |
| <b>Metal chalcogenides/NC</b>                                    |                                              |         |                     |         |                                                                                                         |                                                                                                                                                                    |                                                              |     |
| CoS <sub>2</sub> -NC                                             | 3D; Rhombic dodecahedron                     | 400-500 | 1-2; 49%            | 1.7-2.8 | 1.0 M LiTFSI & 1 wt% LiNO <sub>3</sub> in DOL/DME (v:v=1:1); 40 μL mg <sup>-1</sup>                     | 1C/300 <sup>th</sup> /600 mAh g <sup>-1</sup>                                                                                                                      | 10C/268 mAh g <sup>-1</sup>                                  | 209 |
| CoS <sub>2</sub> -SPAN-CNT                                       | 1D; Nanofiber                                | ~459    | 0.7-5.9; 43.2%      | 1.0-3.0 | 1.0 M LiPF <sub>6</sub> in EC/DME/DEC (v:v:v=1:1:1); 25 μL mg <sup>-1</sup>                             | (2.4 mg cm <sup>-2</sup> )<br>1C/400 <sup>th</sup> /880 mAh g <sup>-1</sup> ;<br>(4.6 mg cm <sup>-2</sup> )<br>0.2C/50 <sup>th</sup> /4.2 mAh cm <sup>-2</sup>     | (2.4 mg cm <sup>-2</sup> )<br>5C/223 mAh g <sup>-1</sup>     | 210 |
| CoS <sub>2</sub> @NGCNs                                          | 3D; Hollow sphere                            | 500     | 1.1-1.5; N/A        | 1.5-2.8 | 1.0 M LiTFSI & 1 wt% LiNO <sub>3</sub> in DOL/DME (v:v=1:1); N/A                                        | 1C/300 <sup>th</sup> /519.4 mAh g <sup>-1</sup>                                                                                                                    | 2C/525.3 mAh g <sup>-1</sup>                                 | 142 |
| Z-CoS <sub>2</sub>                                               | 3D; Hollow rhombic dodecahedron              | ~2000   | N/A, 2.5-2.9; 47.2% | 1.7-3.0 | 1.0 M LiTFSI & 2 wt% LiNO <sub>3</sub> in DOL/DME (v:v=1:1); N/A                                        | 1C/1000 <sup>th</sup> /440 mAh g <sup>-1</sup> ;<br>(2.9 mg cm <sup>-2</sup> )<br>0.2C/150 <sup>th</sup> /2.2 mAh cm <sup>-2</sup>                                 | 5C/430 mAh g <sup>-1</sup>                                   | 211 |
| CNTs/Co <sub>3</sub> S <sub>4</sub> @NC                          | 3D; Hollow cubic                             | 400     | 7.4; 74%            | 1.7-2.8 | 1.0 M LiTFSI & 1 wt% LiNO <sub>3</sub> in DOL/DME                                                       | 5C/1000 <sup>th</sup> /~720 mAh g <sup>-1</sup>                                                                                                                    | 5C/850 mAh g <sup>-1</sup>                                   | 212 |

|                                                                           |                                 |                                 |                          |         |                                                                                                                       |                                                                                                                                                                                                                                                    |                                                                                                                          |     | (v:v=1:1); 50-150 $\mu$ L |
|---------------------------------------------------------------------------|---------------------------------|---------------------------------|--------------------------|---------|-----------------------------------------------------------------------------------------------------------------------|----------------------------------------------------------------------------------------------------------------------------------------------------------------------------------------------------------------------------------------------------|--------------------------------------------------------------------------------------------------------------------------|-----|---------------------------|
| H-LDH/Co <sub>9</sub> S <sub>8</sub>                                      | 3D; Hollow rhombic dodecahedron | ~1000                           | 1.5-2.0, 3.0, 4.0; 64%   | 1.7-2.8 | 1.0 M LiTFSI & 1 wt% LiNO <sub>3</sub> in DOL/DME (v:v=1:1); 40 $\mu$ L                                               | (1.5-2.0 mg cm <sup>-2</sup> )<br>1C/1500 <sup>th</sup> /~250 mAh g <sup>-1</sup> ;<br>(3 mg cm <sup>-2</sup> )<br>1C/300 <sup>th</sup> /400 mAh g <sup>-1</sup>                                                                                   | 2C/669.6 mAh g <sup>-1</sup>                                                                                             | 213 |                           |
| CC@CoSNC                                                                  | 2D; Nanosheet                   | N/A                             | 1.2, 3.7, 8.2; N/A       | 1.7-2.8 | 1.0 M LiTFSI & 20 mM CoCp <sub>2</sub> & 1 wt% LiNO <sub>3</sub> in DOL/DME (v:v=1:1); 15, 8 $\mu$ L mg <sup>-1</sup> | (1.2 mg cm <sup>-2</sup> )<br>2C/1200 <sup>th</sup> /~600 mAh g <sup>-1</sup> ;<br>(4.6 mg cm <sup>-2</sup> )<br>0.5C/300 <sup>th</sup> /734 mAh g <sup>-1</sup> ;<br>(8.2 mg cm <sup>-2</sup> )<br>0.1C/55 <sup>th</sup> /~7 mAh cm <sup>-2</sup> | (1.2 mg cm <sup>-2</sup> )<br>4C/665 mAh g <sup>-1</sup> ;<br>(3.7 mg cm <sup>-2</sup> )<br>0.5C/730 mAh g <sup>-1</sup> | 214 |                           |
| CoSe <sub>2</sub> /C                                                      | 3D; Rhombic dodecahedron        | 700                             | 1.2, 4.4; 51.1%          | 1.7-2.8 | 1.0 M LiTFSI & 2 wt% LiNO <sub>3</sub> in DOL/DME (v:v=1:1); 30, 60 $\mu$ L                                           | (1.2 mg cm <sup>-2</sup> )<br>1C/400 <sup>th</sup> /503.4 mAh g <sup>-1</sup> ;<br>(4.4 mg cm <sup>-2</sup> )<br>0.1C/100 <sup>th</sup> /537.5 mAh g <sup>-1</sup>                                                                                 | (1.2 mg cm <sup>-2</sup> )<br>2C/~700 mAh g <sup>-1</sup>                                                                | 215 |                           |
| Co-Te/NC                                                                  | 3D; Hollow sphere               | 500                             | 1.5; 56%                 | 1.7-2.8 | 1.0 M LiTFSI & 1 wt% LiNO <sub>3</sub> in DOL/DME (v:v=1:1); N/A                                                      | 2C/1000 <sup>th</sup> /558 mAh g <sup>-1</sup>                                                                                                                                                                                                     | 2C/898 mAh g <sup>-1</sup>                                                                                               | 51  |                           |
| CoSe <sub>2</sub> /Co <sub>3</sub> O <sub>4</sub> @NC-CNT                 | 3D; Hollow rhombic dodecahedron | ~1000                           | 2, 5.2, 8.4, 10.1; 64%   | 1.5-3.0 | 1.0 M LiTFSI & 1 wt% LiNO <sub>3</sub> in DOL/DME (v:v=1:1); 48 $\mu$ L                                               | (2 mg cm <sup>-2</sup> )<br>2C/500 <sup>th</sup> /602 mAh g <sup>-1</sup> ;<br>(10.1 mg cm <sup>-2</sup> )<br>0.5C/100 <sup>th</sup> /557 mAh g <sup>-1</sup>                                                                                      | (2 mg cm <sup>-2</sup> )<br>5C/688 mAh g <sup>-1</sup>                                                                   | 216 |                           |
| ZnS-FeS/NC                                                                | 3D; Hollow rhombic dodecahedron | ~100                            | 1.03-3.42; 49%           | 1.6-2.8 | 1.0 M LiTFSI & 1 wt% LiNO <sub>3</sub> in DOL/DME (v:v=1:1); N/A                                                      | 4C/200 <sup>th</sup> /600 mAh g <sup>-1</sup> ;<br>(3.34 mg cm <sup>-2</sup> )<br>0.2C/200 <sup>th</sup> /796 mAh g <sup>-1</sup>                                                                                                                  | 4C/718 mAh g <sup>-1</sup>                                                                                               | 217 |                           |
| ZnSe/NHC                                                                  | 3D; Hollow rhombic dodecahedron | ~200                            | 1, 3.2; 60%              | 1.7-2.8 | 1.0 M LiTFSI & 0.2 M LiNO <sub>3</sub> in DOL/DME (v:v=1:1); 20, 50 $\mu$ L                                           | (1 mg cm <sup>-2</sup> )<br>3C/800 <sup>th</sup> /450 mAh g <sup>-1</sup> ;<br>(3.2 mg cm <sup>-2</sup> )<br>1C/600 <sup>th</sup> /540.5 mAh g <sup>-1</sup>                                                                                       | (1 mg cm <sup>-2</sup> )<br>3C/542 mAh g <sup>-1</sup> ;<br>(3.2 mg cm <sup>-2</sup> )<br>3C/457.7 mAh g <sup>-1</sup>   | 218 |                           |
| Ni <sub>0.1</sub> Zn <sub>0.1</sub> Co <sub>0.8</sub> Se <sub>2</sub> /NC | 3D; Irregular polyhedron        | ~1000                           | 1.0, 3.16, 4.60; 42%     | 1.7-2.8 | 1.0 M LiTFSI & 1 wt% LiNO <sub>3</sub> in DOL/DME (v:v=1:1); 12, 7.6, 5.2 $\mu$ L mg <sup>-1</sup>                    | (1 mg cm <sup>-2</sup> )<br>1C/400 <sup>th</sup> /550 mAh g <sup>-1</sup> ;<br>(4.60 mg cm <sup>-2</sup> )<br>0.1C/100 <sup>th</sup> /598 mAh g <sup>-1</sup>                                                                                      | (1.0 mg cm <sup>-2</sup> )<br>2C/681.74 mAh g <sup>-1</sup>                                                              | 219 |                           |
| CC@CoSe <sub>2</sub> -ZnSe/NC                                             | 2D; Nanosheet                   | 100 (thickness)<br>1200 (width) | 1, 5.8, 7.6, 9.2; 56%    | 1.7-2.8 | 1.0 M LiTFSI & 0.2 M LiNO <sub>3</sub> in DOL/DME (v:v=1:1); 30 $\mu$ L                                               | (1 mg cm <sup>-2</sup> )<br>1C/1800 <sup>th</sup> /400 mAh g <sup>-1</sup> ;<br>(9.2 mg cm <sup>-2</sup> )<br>0.02C/45 <sup>th</sup> /489 mAh g <sup>-1</sup>                                                                                      | (1.0 mg cm <sup>-2</sup> )<br>3C/764 mAh g <sup>-1</sup>                                                                 | 220 |                           |
| <b>Metal nitrides/NC</b>                                                  |                                 |                                 |                          |         |                                                                                                                       |                                                                                                                                                                                                                                                    |                                                                                                                          |     |                           |
| CC@Co <sub>4</sub> N/NC                                                   | 2D; Nanosheet                   | N/A                             | 1; N/A                   | 1.7-2.8 | 1.0 M LiTFSI & 2 M Li <sub>2</sub> S <sub>6</sub> & 0.2 M LiNO <sub>3</sub> in DOL/DME (v:v=1:1); 30 $\mu$ L          | 1C/400 <sup>th</sup> /745 mAh g <sup>-1</sup>                                                                                                                                                                                                      | 3C/~700 mAh g <sup>-1</sup>                                                                                              | 223 |                           |
| <i>h</i> -Co <sub>4</sub> N@NC                                            | 3D; Hollow rhombic dodecahedron | ~600                            | 1.5, 3, 4.5, 6, 8; 60.4% | 1.0-3.0 | 1.0 M LiTFSI & 3 wt% LiNO <sub>3</sub> in DOL/DME (v:v=1:1); N/A                                                      | (1.5 mg cm <sup>-2</sup> )<br>8C/400 <sup>th</sup> /481 mAh g <sup>-1</sup> ;<br>(4.5 mg cm <sup>-2</sup> )<br>2C/400 <sup>th</sup> /516 mAh g <sup>-1</sup> ;<br>(8 mg cm <sup>-2</sup> )<br>N/A/150 <sup>th</sup> /~450 mAh g <sup>-1</sup>      | (1.5 mg cm <sup>-2</sup> )<br>8C/574 mAh g <sup>-1</sup>                                                                 | 224 |                           |
| Co <sub>5.47</sub> N <sub>x</sub> -C                                      | 3D; Hollow sphere               | 200                             | 1.8-2.2; 60.62%          | 1.7-2.6 | 1.0 M LiTFSI & 0.4 M LiNO <sub>3</sub> in DOL/DME (v:v=1:1); N/A                                                      | 2C/1000 <sup>th</sup> /425 mAh g <sup>-1</sup>                                                                                                                                                                                                     | 10C/320 mAh g <sup>-1</sup>                                                                                              | 225 |                           |

|                                         |                                 |       |                              |         |                                                                                                  |                                                                                                                                                                                                                      |                                                                |     |
|-----------------------------------------|---------------------------------|-------|------------------------------|---------|--------------------------------------------------------------------------------------------------|----------------------------------------------------------------------------------------------------------------------------------------------------------------------------------------------------------------------|----------------------------------------------------------------|-----|
| Co-Co <sub>3</sub> Mo <sub>3</sub> N/NC | 3D; Irregular polyhedron        | ~400  | 1.0-5.4; 52.5%               | 1.7-2.8 | 1.0 M LiTFSI & 2 wt% LiNO <sub>3</sub> in DOL/DME (v:v=1:1); 30, 15 $\mu$ L mg <sup>-1</sup>     | (1.5 mg cm <sup>-2</sup> )<br>1C/600 <sup>th</sup> /447 mAh g <sup>-1</sup> ;<br>(5.4 mg cm <sup>-2</sup> )<br>0.1C/120 <sup>th</sup> /3.64 mAh cm <sup>-2</sup>                                                     | (1.0-1.2 mg cm <sup>-2</sup> )<br>3C/704.7 mAh g <sup>-1</sup> | 226 |
| <b><i>Metal phosphides/NC</i></b>       |                                 |       |                              |         |                                                                                                  |                                                                                                                                                                                                                      |                                                                |     |
| CoP@HPCN                                | 3D; Hollow rhombic dodecahedron | ~1000 | 1.1, 2.3, 3.7; 56%           | 1.8-2.8 | 1.0 M LiTFSI & 0.2 M LiNO <sub>3</sub> in DOL/DME (v:v=1:1); 30, 20, 15 $\mu$ L mg <sup>-1</sup> | (3.7 mg cm <sup>-2</sup> )<br>0.2C/200 <sup>th</sup> /579 mAh g <sup>-1</sup>                                                                                                                                        | (1.1 mg cm <sup>-2</sup> )<br>3C/527.7 mAh g <sup>-1</sup>     | 228 |
| CoP@N-C                                 | 3D; Rhombic dodecahedron        | ~500  | 1.5, 7.0; 64%                | 1.7-2.8 | 1.0 M LiTFSI & 1 wt% LiNO <sub>3</sub> in DOL/DME (v:v=1:1); 12-15 $\mu$ L mg <sup>-1</sup>      | (1.5 mg cm <sup>-2</sup> )<br>1C/500 <sup>th</sup> /672 mAh g <sup>-1</sup> ;<br>(7.0 mg cm <sup>-2</sup> )<br>1 mA cm <sup>-2</sup> /100 <sup>th</sup> /891 mAh g <sup>-1</sup><br>(2.31 mg cm <sup>-2</sup> )      | (1.5 mg cm <sup>-2</sup> )<br>5C/712 mAh g <sup>-1</sup>       | 229 |
| CoP@G/CC                                | 2D; Nanosheet                   | N/A   | 2.31, 4.62, 9.55, 10.83; N/A | 1.7-2.8 | 0.5 M LiTFSI & 0.5 wt% LiNO <sub>3</sub> in DOL/DME (v:v=1:1); 12 $\mu$ L mg <sup>-1</sup>       | 2C/500 <sup>th</sup> /~900 mAh g <sup>-1</sup> ;<br>(9.55 mg cm <sup>-2</sup> )<br>0.1C/60 <sup>th</sup> /5 mAh cm <sup>-2</sup> ;<br>(10.83 mg cm <sup>-2</sup> )<br>0.05C/80 <sup>th</sup> /7 mAh cm <sup>-2</sup> | (2.31 mg cm <sup>-2</sup> )<br>3C/931 mAh g <sup>-1</sup>      | 230 |
| CNT/CPO/CPNC                            | 3D; Hollow rhombic dodecahedron | ~1000 | 1.5-1.8; 49%                 | 1.7-3.0 | 1.0 M LiTFSI & 1 wt% LiNO <sub>3</sub> in DOL/DME (v:v=1:1); ~15 $\mu$ L mg <sup>-1</sup>        | 1C/500 <sup>th</sup> /681.5 mAh g <sup>-1</sup>                                                                                                                                                                      | 2C/544.3 mAh g <sup>-1</sup>                                   | 231 |
| NCNT@Co-CoP                             | 1D; Nanotube                    | 100   | 4, 10; N/A                   | 1.7-2.8 | 1.0 M LiTFSI & 2 wt% LiNO <sub>3</sub> in DOL/DME (v:v=1:1); 15, 7 $\mu$ L mg <sup>-1</sup>      | (4 mg cm <sup>-2</sup> )<br>5C/900 <sup>th</sup> /603.9 mAh g <sup>-1</sup> ;<br>(10 mg cm <sup>-2</sup> )<br>2C/100 <sup>th</sup> /4.4 mAh cm <sup>-2</sup>                                                         | (4 mg cm <sup>-2</sup> )<br>5C/710.6 mAh g <sup>-1</sup>       | 232 |
